# Supplementary material for: A study of Kidney Function Among Adult Patients with Sickle Cell Disease Attending
Source: Research Square preprint supplement (doi:10.21203/rs.3.rs-6917599/v1), 2025-07-24
Supplement: Supplementary file 1 [file 3c231e3dc321065b01d96dc2.docx]

**Table 1: Socio-demographic characteristics of study participants**

| **Participant’s**  **characteristic** | **Study group**  **SCD** 210**(%) Controls** 210**(%)** | | **Total** | **p-value** |
| --- | --- | --- | --- | --- |
| **Sex**  Male  Females | 121(57.6)  89 (42.4) | 113 (53.8)  97 (46.2) | 234 (55.7)  186 (44.3) | 0.492* |
| **Age** (mean± SD)  ≤ 35 years  >35years | 26.8±8.2  174 (82.9)  36 (17.1) | 25.7±8.8  195 (92.9)  15 (7.1) | 369 (87.9)  51 (12.1) | 0.100# |
| **Educational level**  No formal education  Primary education  Secondary education  Tertiary education | 12 (5.7)  51 (24.3)  108 (51.4)  39 (18.6) | 4 (1.9)  42 (20)  87 (41.4)  77 (36.7) | 16 (3.8)  93 (22.1)  195 (46.4)  116 (27.6) | < 0.001* |

* Chi square analysis, # independent sample mean statistics, SD =standard deviationTable 2 below shows the distribution of clinical features that were observed among the participants

Table **2 Clinical features of study participants**

| Clinical features | **SCD** 210 (%) | **Control** 210 (%) | **Total** 210 (%) | **p-value*** |
| --- | --- | --- | --- | --- |
| **Body swelling** yes  No | 34 (16.2)  176 (83.8) | 3 (1.4)  207 (98.6) | 37 (8.8)  383 (91.2) | < 0.001 |
| **Frothy urine** yes  No | 37 (17.6)  173 (82.4) | 3 (1.4)  207 (98.6) | 40 (9.5)  380 (90.5) | < 0.001 |
| **Pallor** yes  No | 182 (86.7)  28 (13.3) | 4 (1.9)  206 (98.1) | 186 (44.3)  234 (55.7) | < 0.001 |
| **Facial puffiness** yes  No | 28 (13.3)  182 (86.7) | 3 (1.4)  207 (98.6) | 31 (7.9)  389 (92.1) | < 0.001 |
| **Systolic** BP normal  Hypertension | 160 (76.2)  50 (23.8) | 150 (71.4)  60 (28.6) | 310 (73.8)  110 (26.2) | 0.267 |
| **Diastolic** BP normal  Hypertension | 177 (84.3)  33 (15.7) | 170 (81.0)  40 (19.0) | 347 (82.6)  73 (17.4) | 0.018 |
| **BMI** underweight  normal  overweight | 2 (0.9)  199 (94.8)  9 (4.3) | 0 (0.0)  169 (80.5)  41 (19.5) | 2 (0.5)  368 (87.6)  50 (11.9) | < 0.001 |

*= Chi square test

**Table3 Distribution of laboratory parameters of participants**

| **Laboratory Parameters** | **SCD** 210(%) | **Controls**  210(%) | **p-values*** |  |
| --- | --- | --- | --- | --- |
| **Haemoglobin** (g/dl)  ≥ 13  11-12.9  8-10.9  < 8 | 0 (0)  0 (0)  127(60.5)  83 (39.5) | 84 (40.0)  61(29.0)  65 (39.0)  0 (0) | < 0.001 |  |
| **ACR** (mg/mmol)  ≤ 3  3-30  >30 | 111 (52.9)  83 (42.4)  10 (4.8) | 197 (93.7)  13 (6.2)  0 (0.0) | < 0.001 |  |
| **eGFR** (ml/min/1.73m2)  >90  60-89  30-59  15-29  <15 | 162 (77.1)  30 (14.3)  13 (6.2)  4 (1.9)  1 (0.5) | 195 (92.8)  14 (6.7)  1 (0.5)  0 (0.0)  0 (0.0) | < 0.001 |  |
| **pH**  < 7  > 7 | 136 (64.8)  74 (35.2) | 210(100)  0 (0.0) | < 0.001 |  |
| **SG**  ≥ 1.015  < 1.015 | 140 (66.7)  70 (33.3) | 210(100)  0 (0.0) | < 0.001 |  |

*= Pearson’s chi square analysis

Participants with SCD had significantly lower BMI (21.8 ± 1.9 vs. 22.7 ± 3.4 kg/m2

p = 0.001) when compared with controls. The urine specific gravity was significantly lower in patients with SCD compared with controls. The urinary albumin creatinine ratio was statistically significantly higher in participants with SCD compared with controls. There is no statistically significant difference in the mean eGFR of participants with SCD when compared with controls (133.4 ± 48.3 vs. 138.1 ± 30.0 ml/min/1.73m2, p = 0.236).

**Table 4: Summary of Means ± SD of kidney function and clinical parameters of study participants**

| **Variables** | **SCD**  mean± SD | **Controls**  mean± SD | **T-Test statistics** | **p-value** |
| --- | --- | --- | --- | --- |
| Sys.BP(mmHg) | 115.8 ± 14.0 | 115.3 ± 11.3 | -1.341 | 0.726 |
| BMI(kg/m2) | 21.8 ± 1.9 | 22.7 ± 3.4 | -3.273 | 0.001 |
| eGFR(ml/min/m2) | 133.4 ± 48.3 | 138.1±30.0 | -1.186 | 0.236 |
| pH | 6.6 ± 0.41 | 5.8 ± 0.4 | 17.186 | 0.001 |
| SG | 1.016±0.006 | 1.023 ± 0.003 | -14.627 | 0.001 |
| ACR(mg/mmol) | 2.8(6.4) | 1.7(0.5) | 58.372# | 0.001 |

M= mean, SD= Standard deviation, # independent sample median test statistics

Table 5 shows the frequency of the types of haemoglobin among the study participants with SCD. One hundred and eighty eight (89.5%) have HbS while 22 (10.5%) have HbSC. There is no statistically significant gender difference in the frequency of HbS and HbSC among the study participants with SCD.

**Table 5: Distribution of types of haemoglobin among study group**

|  | | | | | |
| --- | --- | --- | --- | --- | --- |
|  | | | SEX | | **Total n (%)** |
| Female n (%) | Male n (%) |
| TYPES OF HAEMOGLOBIN | HbSS |  |  |  |  |
|  | 76 (36.2) | 112 (53.3) | 188 (89.5) |
| HbSC |  |  |  |  |
|  | 13 (6.2) | 9 (4.3) | 22 (10.5) |
| **Total** | |  |  |  |  |
|  | 89 (42.4) | 121 (57.6) | 210 (100.0) |

X2 = 2.810, p = 0.094

Table 6 below shows the prevalence of eGFR < 60ml/min/1.73m2 was higher in participants with HbSC compared to participants with HbSS (13.8% vs. 8.0%, x2 = 8.5, p = 0.056). Also, the prevalence of ACR > 3mg/mmol was significantly higher in participants with HbSC compared with those with HbS (68.3% vs. 43.7%, x2 = 4.37, p =0.043). Haematuria was significantly higher in participants with HbSC when compared with those with HbS (41% vs. 16%, x2 = 8.11, p = 0.004). There is no statistically significant difference in the ability to acidify urine in participants with HbS and HbSC.

**Table 6: Relationship between pattern of kidney function indices and types of haemoglobin**

| variables | Types of haemoglobin | |  | | |
| --- | --- | --- | --- | --- | --- |
| **eGFR (ml/min/1.73m2 )** | **HbSS**  **188 (%)** | **HbSC**  **22 (%)** | **Total (SCD) 210 (%)** | **X2** | **p-value*** |
| ≥ 90 | 148 (78.7) | 14 (63.6) | 162 (77.1) |  |  |
| 60-89 | 25 (13.3) | 5 (22.7) | 30 (14.3) | 8.5 | 0.056 |
| 30-59 | 12 (6.4) | 1 (4.6) | 13 (6.2) |  |  |
| 15-29 | 3 (1.6) | 1 (4.6) | 4 (1.9) |  |  |
| < 15 | 0 (0) | 1 (4.6) | 1 (0.5) |  |  |
| **ACR (mg/mmol)**  ≤ 3mg/mmol  ≥3mg/mmol  **pH**  Ability to acidify urine  Impaired ability to acidify urine  **Specific gravity**  1.005-1.009  1.010-1.014  1.015-1.019  1.020-1.024  1.025-1.029  ≥ 1.030  **Haematuria**  Positive  Negative | 104 (55.3)  84 (43.7)  121 (64.4)  67 (35.6)  7 (3.7)  58 (30.9)  63 (33.5)  49 (26.1)  10 (5.3)  1 (0.5)  30 (16.0)  158 (84.0) | 7 (31.7)  15 (68.3)  15 (68.2)  7 (31.6)  2 (9.1)  3 (13.6)  8 (36.4)  8 (36.4)  1 (4.6)  0 (0)  9 (41.0)  13 (59.0) | 111 (52.9)  99 (47.1)  136 (64.8)  74 (35.2)  9 (4.3)  61 (29.1)  71 (33.8)  57 (27.1)  11 (5.2)  1 (0.5)  39 (18.6)  171 (81.4) | 4.37  0.126  5.46  8.11 | 0.043  0.723  0.344  0.004 |

*=Pearson’s Chi square analysis of relationship between kidney function indices and types of haemoglobin (HbSS and HbSC)

Table7 shows a Pearson correlation analyses to assess relationship between BMI and markers of kidney dysfunction in participants with SCD which did not show any significant relationships between BMI and ACR, eGFR, pH and SG.

**Table7. Summary of relationships between BMI and markers of kidney dysfunction (albuminuria, eGFR, pH and SG) in patients with SCD**

|  | | ACR | EGFR | PH | SG |
| --- | --- | --- | --- | --- | --- |
| BMI | Coefficient of correlation (r) | 0.001 | 0.015 | 0.077 | 0.093 |
| p-value | 0.991 | 0.830 | 0.266 | 0.181 |

r = coefficient of correlation

Table 8 below shows a correlation analyses to assess relationship between systolic blood pressure and markers of kidney dysfunction among SCD participants. There was a positive, strong and statistically significant correlation between systolic BP and ACR (r = 0.603, P <0.001). There was also a statistically significant correlation between systolic BP and eGFR (r = 0.657, P < 0.001)

**Table 8: Summary of relationships between systolic blood pressure and markers of kidney dysfunction (albuminuria, eGFR, pH and SG) Among SCD Participants in fig 10-13**

|  |  | ACR | eGFR | pH | SG |
| --- | --- | --- | --- | --- | --- |
| SysBP | Coefficient of correlation (r) | 0.603 | 0.657 | 0.452 | 0.436 |
| p value | <0.001* | <0.001* | <0.001* | <0.001* |

r = coefficient of correlation, *= statistically significant.

Table 9 shows a weakly positive and statistically significant correlation between diastolic BP and ACR (r = 0.547 P = < 0.001). There were also significant and negative correlation between diastolic blood pressure and eGFR (r = 0.640, p = < 0.001). A weak and non-significant relationship exists between diastolic blood pressure, pH and SG.

**Table 9: Table showing summary of relationship between diastolic blood pressure and markers of kidney dysfunction (ACR eGFR pH SG)**

|  | **ACR** | **eGFR** | **pH** | **SG** |  |
| --- | --- | --- | --- | --- | --- |
| **Diastolic** Coefficient of correlation (r)  **BP** | 0.547 | 0.640 | 0.399 | 0.423 |  |
| P value | <0.001* | <0.001* | 0.021 | 0.016 |  |
|  |  |  |  |  |  |

r = coefficient of correlation, *statistically significant**.**

Table 10 belowshows a strong positive and statistically significant correlation between age and ACR (r = 0.689, P = 0.001). Pearson correlation analyses revealed a strong negative and statistically significant correlation between age and eGFR (r= -0.689, p <0.001). There were weak but significant correlations with urine pH and SG.

**Table10. Summary of relationship between age and markers of kidney dysfunction (albuminuria, eGFR, pH and SG) Among SCD Participants**

|  |  | ACR | eGFR | pH | SG |
| --- | --- | --- | --- | --- | --- |
| AGE | Correlation Coefficient | 0.548 | -0.689 | -0.415 | 0.429 |
| p value | <0.001* | <0.001* | <0.001* | <0.001* |

r = coefficient of correlation, *=statistically significant

**Table11.** Summary of multiple regression of clinical parameters (BP, BMI and age) and kidney function indices (eGFR, ACR, pH, SG and Haematuria) in patients with SCD

| Variable | AOR | p-value | 95%CI  Lower Upper | |
| --- | --- | --- | --- | --- |
|  | **eGFR** | | | |
| **Systolic BP** | 0.544 | 0.594 | 0.058 | 5.083 |
| **BMI** Underweight | - | 1.000 |  |  |
| Normal | 4.148 | 1.000 | 0.000 | - |
| Overweight | 4.356 | 0.997 | 0.000 | - |
| **Age** | 6.386 | 0.047 | 0.010 | 0.391 |
| **Diastolic BP** | 0.620 | 0.003 | 1.024 | 39.837 |
|  | **ACR** | | | |
| **Systolic BP** | 1.252 | 0.497 | 0.655 | 2.394 |
| **BMI** Underweight | - | 0.323 | - | - |
| Normal | 0.000 | 0.999 | 0.000 | 1.000 |
| Overweight | 1.953 | 0.133 | 0.816 | 4.670 |
| **Age** | 0.940 | 0.000 | 0.032 | 0.279 |
| **Diastolic BP** | 3.081 | 0.010 | 1.314 | 7.225 |
|  | **PH** | | | |
| **Systolic BP** | 0.618 | 0.278 | 0.259 | 1.473 |
| **BMI** Underweight | - | 0.875 | - | - |
| Normal | 0.000 | 0.999 | 0.000 | 1.00 |
| Overweight | 1.390 | 0.606 | 0.398 | 4.898 |
| **Age** | 0.206 | 0.007 | 0.066 | 0.645 |
| **Diastolic BP** | 1.531 | 0.453 | 0.504 | 4.650 |
|  | **Specific Gravity** | | | |
| **Systolic BP** | 4.840 | 0.020 | 1.770 | 13.234 |
| **BMI** Underweight | - | 0.286 | - | - |
| Normal | 0.000 | 0.999 | 0.000 | 1.000 |
| Overweight | 2.190 | 0.114 | 0.829 | 5.780 |
| **Age** | 0.593 | 0.476 | 0.141 | 2.495 |
| **Diastolic BP** | 0.891 | 0.853 | 0.262 | 3.034 |
|  | **Haematuria** | | | |
| **Systolic BP** | 5.066 | 0.000 | 1.755 | 14.628 |
| **BMI** Underweight | - | 0.530 | - | - |
| Normal | 0.000 | 0.999 | 0.000 | 1.000 |
| Overweight | 5.979 | 0.015 | 1.409 | 25.376 |
| **Age** | 1.100 | 0.914 | 1.193 | 6.271 |
| **Diastolic BP** | 0.013 | 0.605 | 0.169 | 2.819 |

AOR = Adjusted Odd Ratio, CI = Confidence Interval

Diastolic blood pressure and age were the factors that significantly influence the kidney function (eGFR and ACR) in patients with SCD (AOR= 0.620, 0.940 and p-value = 0.003, < 0.001.) Body mass index (BMI) and systolic BP do not significantly influence the kidney function of patients with SCD (Table 11)
